# Supplementary material for: Dual-site mixed layer-structured FAxCs3−xSb2I6Cl3 Pb-free metal halide perovskite solar cells
Source: Royal Society of Chemistry journal article supplement (doi:10.1039/d0ra00787k), 2020-01-01
Supplement: d0ra00787k1.pdf [file d0ra00787k1.pdf]

## Electronic Supplementary Information (ESI)

# Dual-site mixed layer-structured $\text{FA}_x\text{Cs}_{3-x}\text{Sb}_2\text{I}_6\text{Cl}_3$ Pb-free metal halide perovskite solar cells

Yong Kyu Choi,<sup>a</sup> Jin Hyuck Heo,<sup>a</sup> Ki-Ha Hong,<sup>\*,b</sup> Sang Hyuk Im,<sup>\*,a</sup>

<sup>a.</sup> Department of Chemical and Biological Engineering, Korea University, 145 Anam-ro, Seongbuk-gu, Seoul 02841, Korea. E-mail: imromy@korea.ac.kr

<sup>b.</sup> Department of Materials Science and Engineering, Hanbat National University, 125 Dongseo-daero, Yuseong-Gu, Daejeon, 34158, Korea. E-mail: kiha.hong@hanbat.ac.kr

## Experimental Section

### Materials

All reagents were purchased from the following companies and used without further purifications. CsI (Cesium iodide, 99.9% Sigma-Aldrich), SbI<sub>3</sub> (antimony(III) iodide, 99.8% Sigma-Aldrich), SbCl<sub>3</sub> (Antimony(III) chloride, 99% Sigma-Aldrich), CsCl (Cesium Chloride, 99.9%, Sigma-Aldrich), HI solution (hydroiodic acid, 57wt% in H<sub>2</sub>O, Sigma-Aldrich), FACl (Formamidinium Chloride, >97%, TCI), formamidinium acetate salt (99%, Sigma-Aldrich), methylamine solution (40 wt.% in H<sub>2</sub>O, Sigma-Aldrich), anhydrous ethanol (99.9%, Samchun), diethyl ether (99.0%, Samchun), N,N dimethylformamide DMF, Sigma-Aldrich), titanium diisopropoxide bis(acetylacetonate) (TAA, Sigma-Aldrich), Li-bis(trifluoromethanesulfonyl) imide (Li-TFSI, Sigma-Aldrich), tert-butylpyridin (t-BP, Sigma-Aldrich), acetonitrile (Sigma-Aldrich), and poly-triarylamine (PTAA, EM-index) were purchased.

### Synthesis of formamidinium iodide ( $\text{HC}(\text{NH}_2)_2\text{I}$ , FAI)

FAI was synthesized by dissolving 17.9g of formamidinium acetate salt in 10 ml of anhydrous ethanol charged in round bottomed flask (RBF) and the solution was cooled to below 0 °C in an ice bath. Then, 25 ml of HI solution was slowly added by dropping funnel into the solution for 2 h. The solution was dried by a rotary evaporator. The powder was purified by recrystallization in diethyl ether. The recrystallized powder was then dried overnight in a vacuum oven.

### Synthesis of methylammonium iodide ( $(\text{CH}_3\text{NH}_3)\text{I}$ , MAI)

MAI was synthesized by dissolving 14.8 ml of methylamine solution in 10 ml of anhydrous ethanol charged in round bottomed flask (RBF) and the solution was cooled to below 0 °C in an ice bath. Then, 25 ml of HI solution was slowly added by dropping funnel into the solution for 2 h. The solution was dried by a rotary evaporator. The powder was purified by recrystallization in diethyl ether. The recrystallized powder was then dried overnight in a vacuum oven.

### *Synthesis of methylammonium Chloride ((CH<sub>3</sub>NH<sub>3</sub>)Cl, MACl)*

MACl was synthesized by dissolving 23.8 ml of methylamine solution in 10 ml of anhydrous ethanol charged in round bottomed flask (RBF) and the solution was cooled to below 0 °C in an ice bath. Then, 25 ml of HCl solution was slowly added by dropping funnel into the solution for 2 h. The solution was dried by a rotary evaporator. The powder was purified by recrystallization in diethyl ether. The recrystallized powder was then dried overnight in a vacuum oven.

### *Preparation of MA<sub>3</sub>Sb<sub>2</sub>I<sub>9</sub>, MA<sub>3</sub>Sb<sub>2</sub>I<sub>6</sub>Cl<sub>3</sub>, and FACs<sub>2</sub>Sb<sub>2</sub>I<sub>6</sub>Cl<sub>3</sub> MHP solutions*

For the preparation of MA<sub>3</sub>Sb<sub>2</sub>I<sub>9</sub>, MA<sub>3</sub>Sb<sub>2</sub>I<sub>6</sub>Cl<sub>3</sub>, and FACs<sub>2</sub>Sb<sub>2</sub>I<sub>6</sub>Cl<sub>3</sub> solution, we prepared 0.3M MAI, 0.3M MACl, 0.3M FACl, 0.3M CsCl, and 0.3M SbI<sub>3</sub> in DMF. We mixed 3:2 (vol.:vol.) of MAI:SbI<sub>3</sub> solution for MA<sub>3</sub>Sb<sub>2</sub>I<sub>9</sub>, 3:1 (vol.:vol.) of MACl:SbI<sub>3</sub> solution for MA<sub>3</sub>Sb<sub>2</sub>I<sub>6</sub>Cl<sub>3</sub>, and 1:2:2 (vol.:vol.:vol.) of FACl:CsCl:SbI<sub>3</sub> solution were for FACs<sub>2</sub>Sb<sub>2</sub>I<sub>6</sub>Cl<sub>3</sub>. To make a clear solution by enhancing solubility, we added HI solution in the MHP solution (HI:MHP solution = 1:100 vol.:vol.).

### *Fabrication of MHP SCs*

For MHP SCs, ~50 nm-thick blocking TiO<sub>2</sub> (bl-TiO<sub>2</sub>) was deposited on a patterned FTO substrate (Pilkington, TEC-8) by a spray pyrolysis deposition using 20 mM of TAA solution at 500 °C. A mesoporous TiO<sub>2</sub> (m-TiO<sub>2</sub>, Share-Chem) with ~400 nm-thickness was deposited by spin-coating on the bl-TiO<sub>2</sub>/FTO substrate at 5000 rpm for 30 s and calcined at 500 °C for 1 h in air to remove organic components. For the fabrication of MHP films, the m-TiO<sub>2</sub>/bl-TiO<sub>2</sub>/FTO substrates were treated by argon atmospheric pressure plasma (FemtoScience). Then the MHP solutions filtered by 0.45 μm polytetrafluoroethylene (PTFE) were spin-coated on the mp-TiO<sub>2</sub>/bl-TiO<sub>2</sub>/FTO substrates at 2000 rpm for 30 s. During the spin-coating process, cold diethyl ether was dropped on the spinning substrates in ~10 s after beginning spin-coating. The MHP/ mp-TiO<sub>2</sub>/bl-TiO<sub>2</sub>/FTO substrates were then heat-treated on a hotplate at 200 °C for 5 min at N<sub>2</sub> atmosphere. PTAA hole transporting layer was formed by spin-coating of PTAA/toluene (15 mg/1 ml) with 7.5 μL of Li-TFSI/acetonitrile (170 mg/1 mL) and 7.5 μL of t-BP/acetonitrile (1 mL/1 mL) additives on the MHP/ mp-TiO<sub>2</sub>/bl-TiO<sub>2</sub>/FTO substrates at 5000 rpm for 30 s. Finally, an Au counter electrode was deposited by thermal evaporation. The active areas of all devices were fixed to 16 mm<sup>2</sup>.

### *Characterizations*

The morphologies of the prepared samples were characterized using a field-emission scanning electron microscope (FE-SEM, FEI, Quanta 250 FEG). The crystal structure of the obtained product was examined by an X-ray diffractometer (XRD, Smartlab, Rigaku). The changes in the work-function and highest occupied molecular orbital (HOMO) states were measured by an ultra violet photoelectron spectroscopy (UPS, Thetaprobe (Thermo)). The external quantum efficiency (EQE) was measured by a power source (ABET, 150 W xenon lamp, 13014) with a monochromator (Dongwoo Optron Co., Ltd., MonoRa500i) and a potentiostat (Ivium, IviumStat). The current density-voltage (J-V) curves were measured by a solar simulator (Peccell, PEC-L01) with a potentiostat (IVIUM, IviumStat) under an illumination of 1 sun (100 mW/cm<sup>2</sup> AM 1.5G) and a certified Si-reference

cell from JIS (Japanese Industrial Standards). The J-V curves of all devices were measured by masking the active area with a metal mask (aperture = 9.6 mm<sup>2</sup>).

#### *DFT calculations*

Density function theory (DFT) calculations were conducted with the Vienna ab initio simulation package (VASP).<sup>S1,S2</sup> We adopted the modified the modified Perdew–Burke–Ernzerhof generalized gradient approximation (PBEsol-GGA).<sup>S3</sup> which has been successfully applied to reproduce the experimental lattice constants of halide perovskites.<sup>S4,S5</sup> Valence electronic wave functions are expanded in a planewave basis set with a cutoff energy of 500 eV. The optimized lattice structures are obtained by fully relaxing atomic movement and lattice vectors using  $\Gamma$ -centered k-point grid by  $4 \times 4 \times 4$  and  $4 \times 4 \times 2$  for layered and dimer structures, respectively. We calculated minimally five atomic configurations for mixed perovskites and then select the minimum energy configuration.

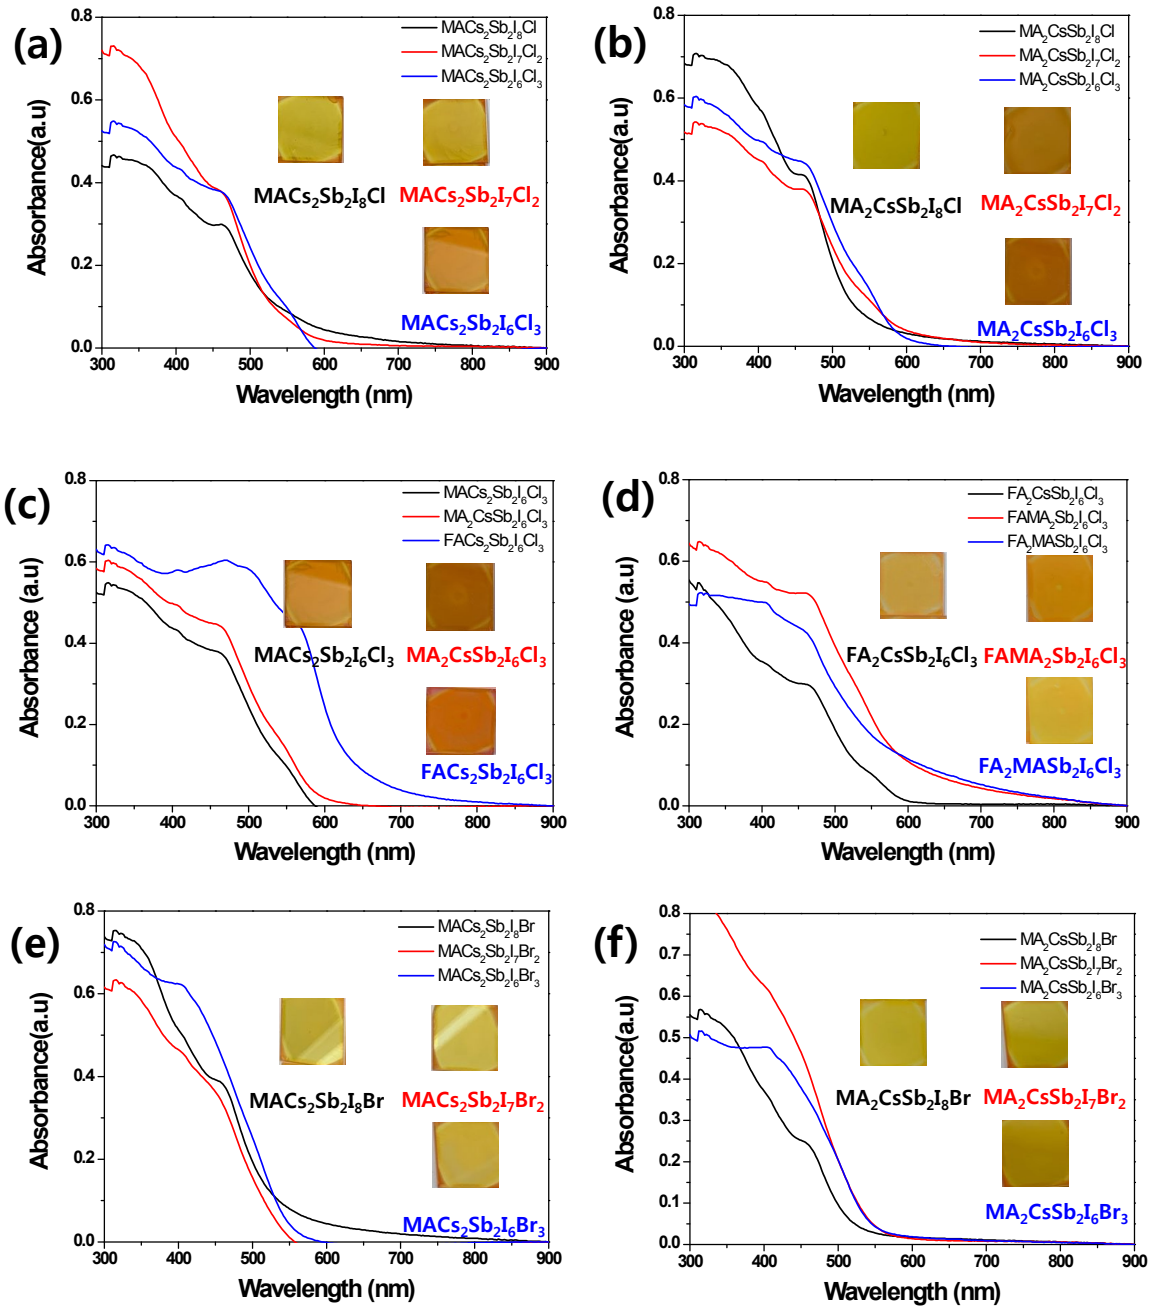

**Figure S1.** Screening experiments to find narrow bandgap of dual-sited mixed MHP films. (a)  $\text{MACs}_2\text{Sb}_2\text{I}_6\text{Cl}_3$ ,  $\text{MACs}_2\text{Sb}_2\text{I}_7\text{Cl}_2$ , and  $\text{MACs}_2\text{Sb}_2\text{I}_8\text{Cl}$  film, (b)  $\text{MA}_2\text{CsSb}_2\text{I}_6\text{Cl}_3$ ,  $\text{MA}_2\text{CsSb}_2\text{I}_7\text{Cl}_2$ , and  $\text{MA}_2\text{CsSb}_2\text{I}_8\text{Cl}$  film, (c)  $\text{MACs}_2\text{Sb}_2\text{I}_6\text{Cl}_3$ ,  $\text{MA}_2\text{CsSb}_2\text{I}_6\text{Cl}_3$ , and  $\text{FACs}_2\text{Sb}_2\text{I}_6\text{Cl}_3$  film, (d)  $\text{FA}_2\text{CsSb}_2\text{I}_6\text{Cl}_3$ ,  $\text{FAMA}_2\text{Sb}_2\text{I}_6\text{Cl}_3$ , and  $\text{FA}_2\text{MASb}_2\text{I}_6\text{Cl}_3$  film, (d)  $\text{MACs}_2\text{Sb}_2\text{I}_8\text{Br}$ ,  $\text{MACs}_2\text{Sb}_2\text{I}_7\text{Br}_2$ , and  $\text{MACs}_2\text{Sb}_2\text{I}_6\text{Br}_3$  film, and (f)  $\text{MA}_2\text{CsSb}_2\text{I}_8\text{Br}$ ,  $\text{MA}_2\text{CsSb}_2\text{I}_7\text{Br}_2$ , and  $\text{MA}_2\text{CsSb}_2\text{I}_6\text{Br}_3$  film.

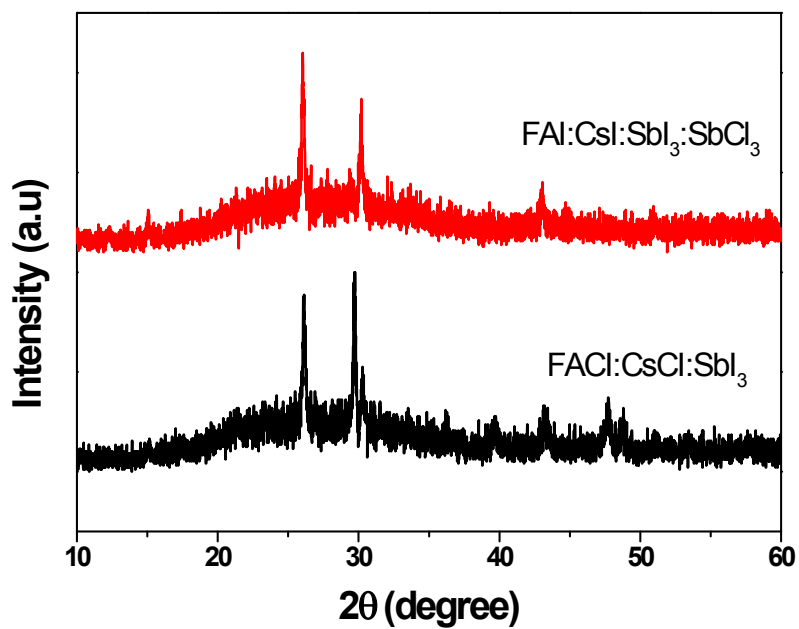

**Figure S2.** XRD patterns of  $\text{FACs}_2\text{Sb}_2\text{I}_6\text{Cl}_3$  MHP powder prepared by mixing 1:2:2 molar ratio of  $\text{FAcI}:\text{CsCl}:\text{SbI}_3$  (black line) and 1:2:1:1 molar ratio of  $\text{FAI}:\text{CsI}:\text{SbI}_3:\text{SbCl}_3$  (red line).

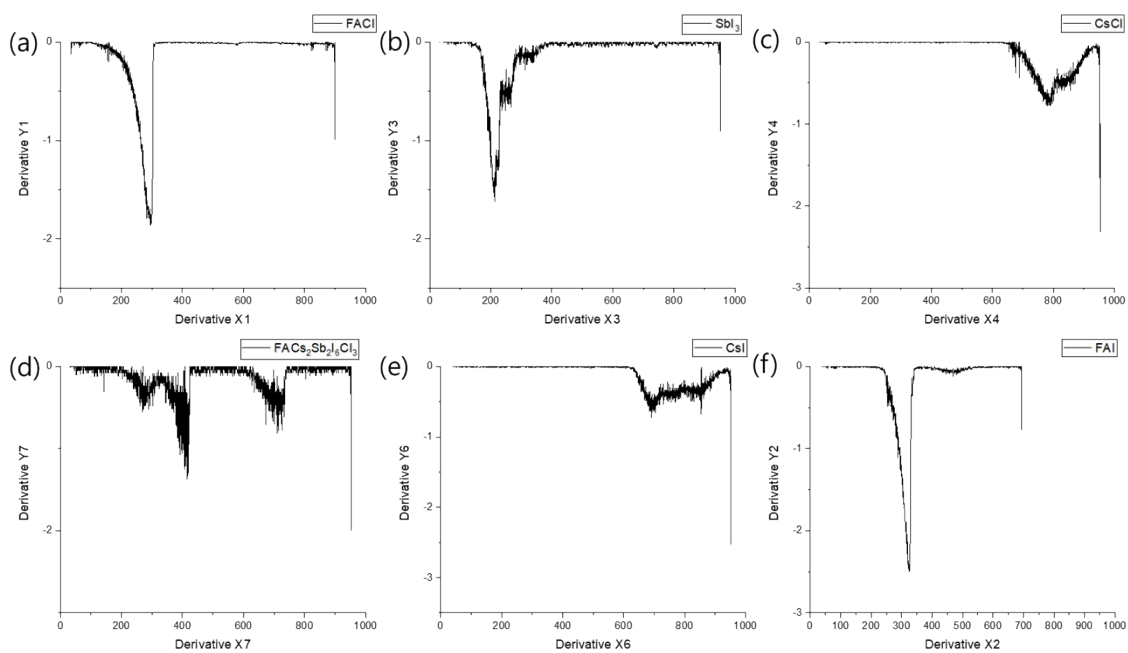

**Figure S3.** DTA (differential thermal analysis) spectra of each component of (a) FAlCl, (b) SbI<sub>3</sub>, (c) CsCl, (d) FACS<sub>2</sub>Sb<sub>2</sub>I<sub>6</sub>Cl<sub>3</sub>, (e) CsI, and (f) FAl.

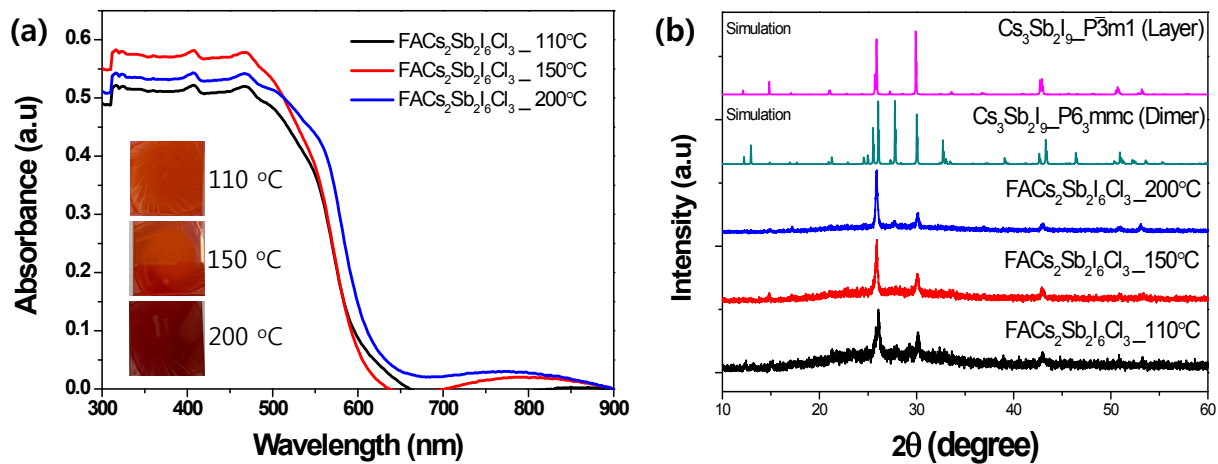

**Figure S4.** (a) UV-visible absorption spectra (inset = photographs of the heat-treated MHP films) and (b) XRD patterns of FACs<sub>2</sub>Sb<sub>2</sub>I<sub>6</sub>Cl<sub>3</sub> MHP films heat-treated at different temperatures.

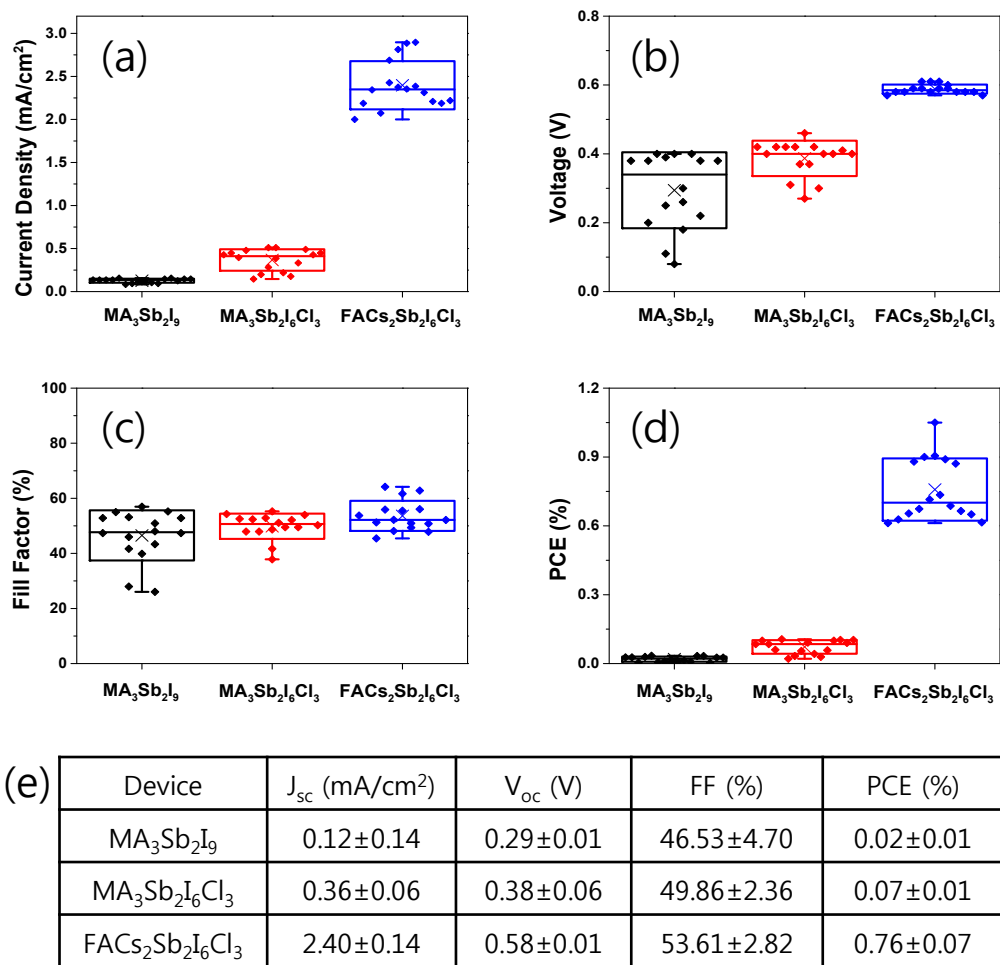

**Figure S5.** Average photovoltaic properties of 16 samples for each device: (a-d) box plots of current density (a), voltage (b), fill factor (c), and PCE (d) and their summaries (e).



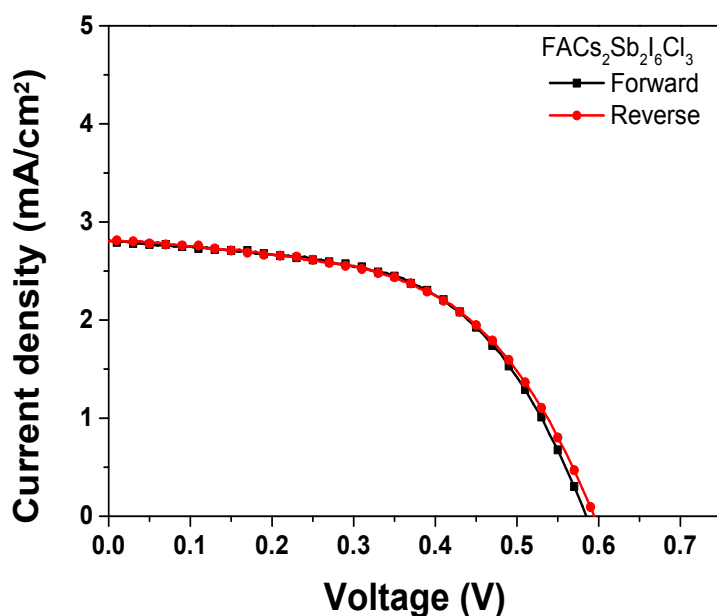

**Figure S6.** J-V curves of  $\text{FACs}_2\text{Sb}_2\text{I}_6\text{Cl}_3$  MHP SC measured by forward and reverse scan condition.

## References

- (S1) Kresse, G.; Hafner, J. Ab Initio Molecular Dynamics for Liquid Metals. *Phys. Rev. B.* **1993**, *47*, 558–561
- (S2) Kresse, G.; Furthmüller, J. Efficiency of Ab-Initio Total Energy Calculations for Metals and Semiconductors Using a Plane-Wave Basis Set. *Comput. Mater. Sci.* **1996**, *6*, 15–50
- (S3) Perdew, J. P.; Ruzsinszky, A.; Csonka, G. I.; Vydrov, O. A.; Scuseria, G. E.; Constantin, L. A.; Zhou, X.; Burke, K.; Restoring the Density-Gradient Expansion for Exchange in Solids and Surfaces. *Phys. Rev. Lett.* **2008**, *100*, 136406.
- (S4) Kim, J., Lee, S.-H., Chung, C.-H.; Hong, K.-H. Systematic Analysis of the Unique Band Gap Modulation of Mixed Halide Perovskites. *Phys. Chem. Chem. Phys.* **2016**, *18*, 4423–4428
- (S5) Leguy, A. M. A.; Frost, J. M.; McMahon, A. P.; Sakai, V. G.; Kockelmann, W.; Law, C.; Li, X.; Foglia, F.; Walsh, A.; O'Regam, B. C.; Nelson, J.; Cabral, J. T.; Barnes, P. R. F.; The Dynamics of Methylammonium Ions in Hybrid Organic-Inorganic Perovskite Solar Cells. *Nat. Com.* **2015**, *6*, 7124
